# Supplementary material
Source: PubMed Central journal article supplement (PMC5179090)

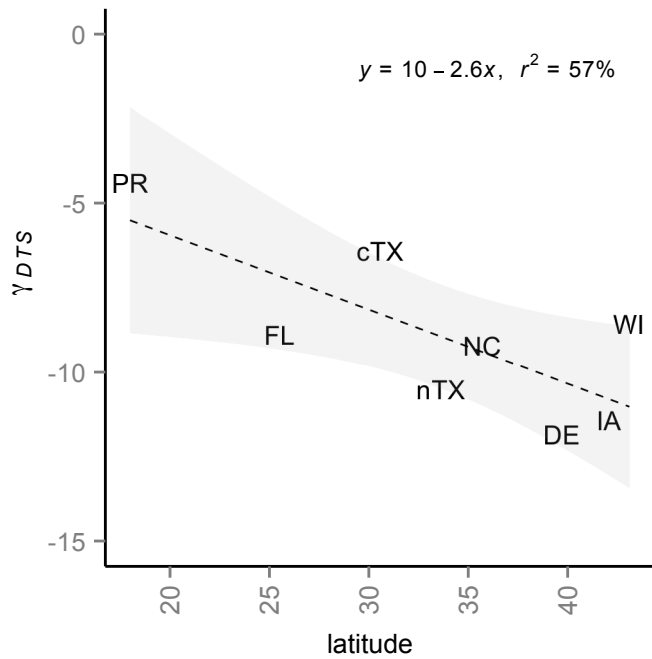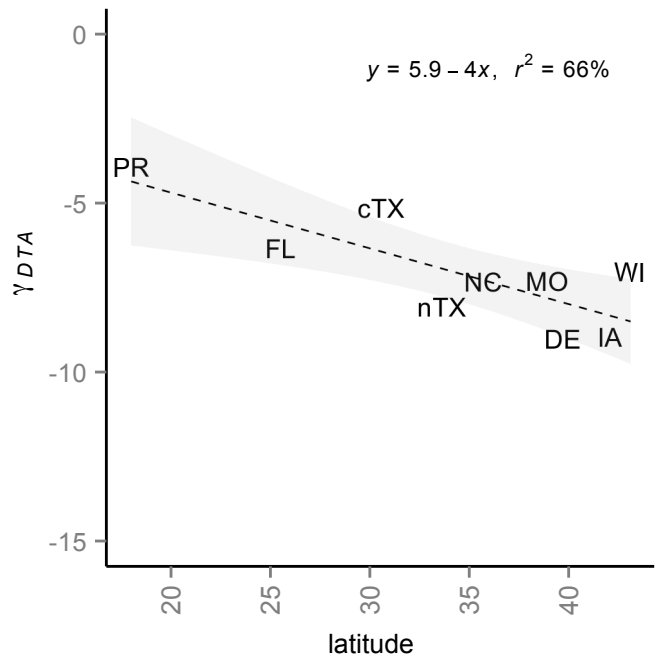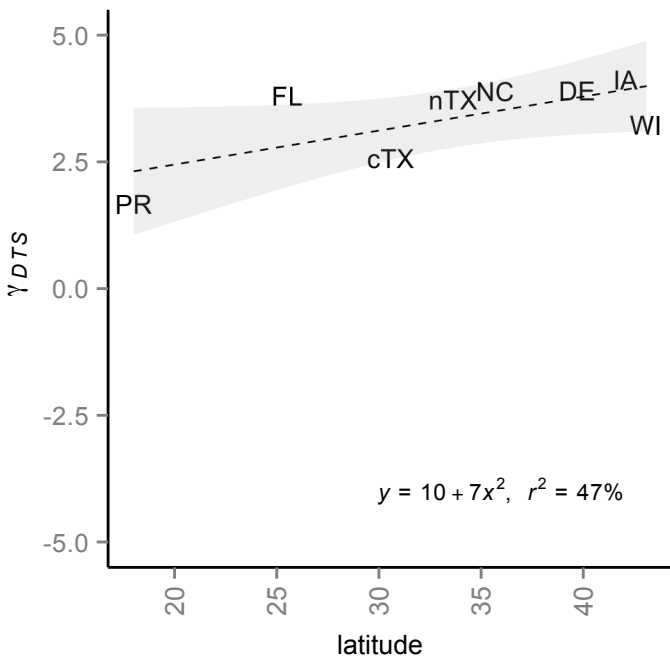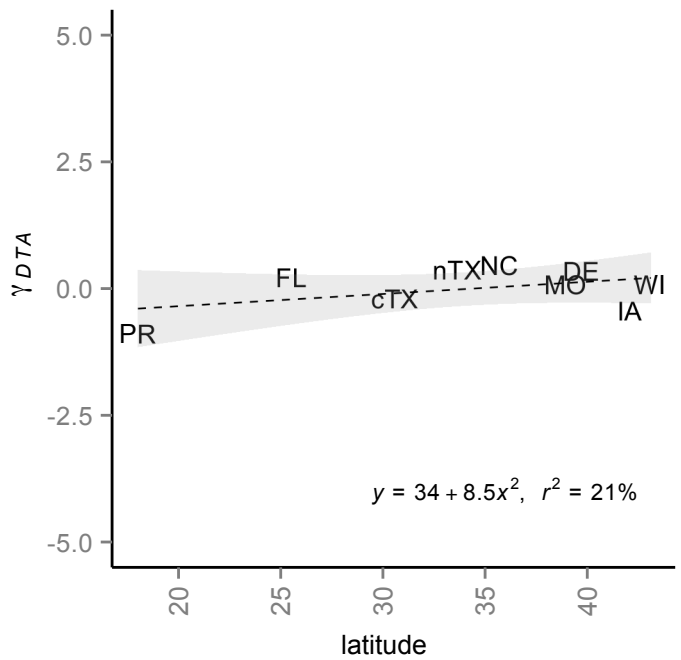

# DTA

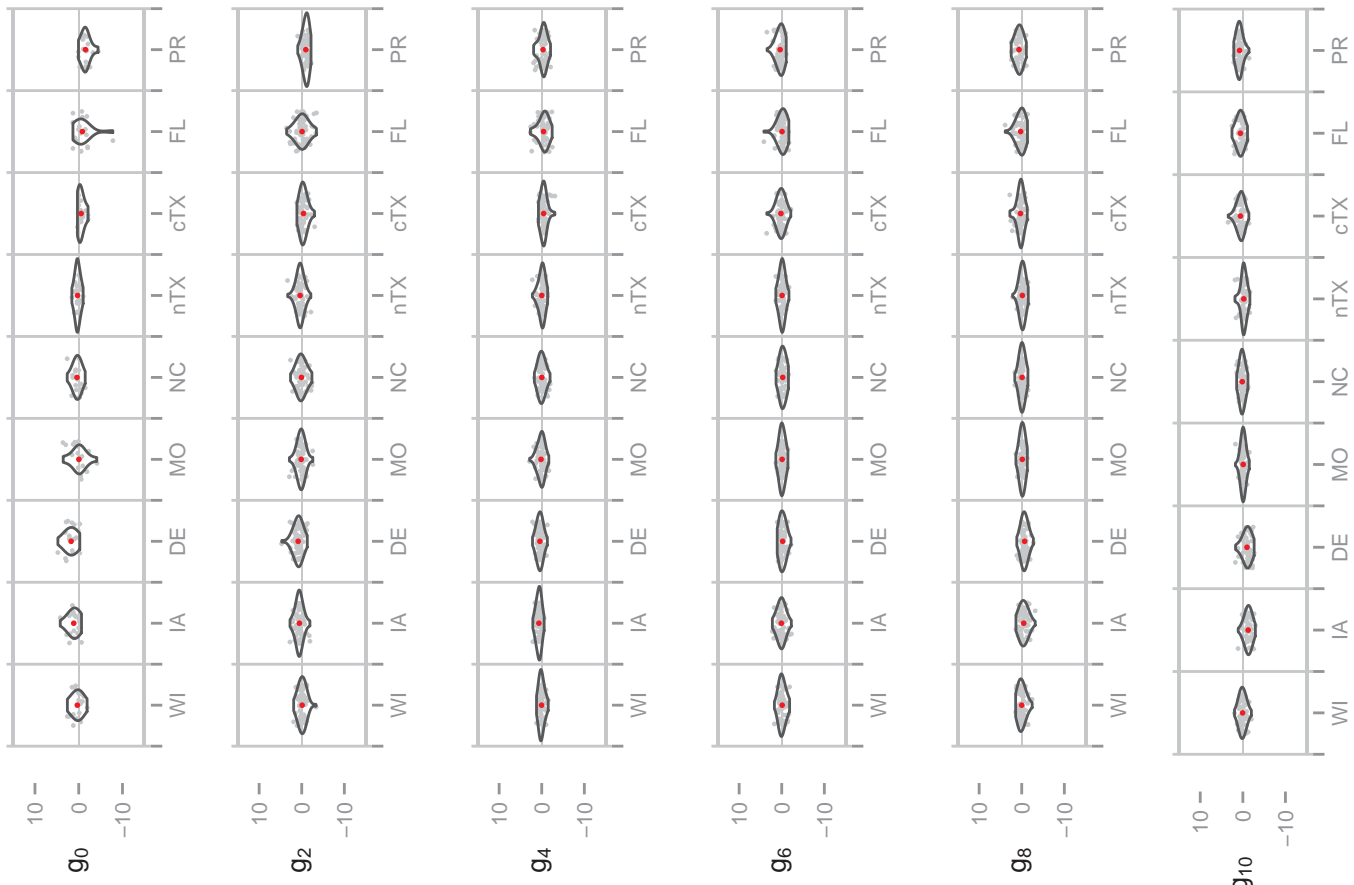

# DTS

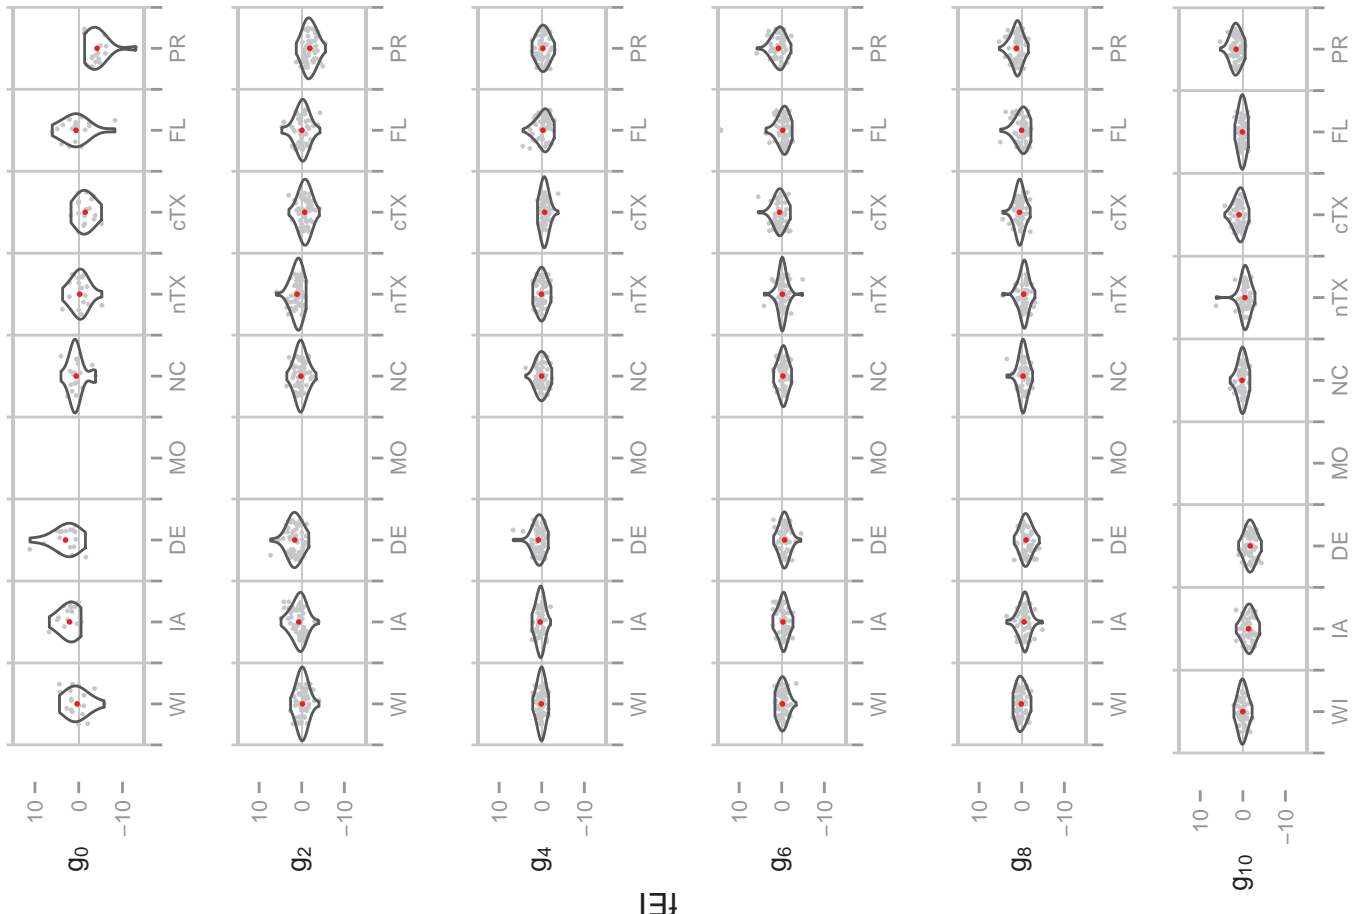

## DTS

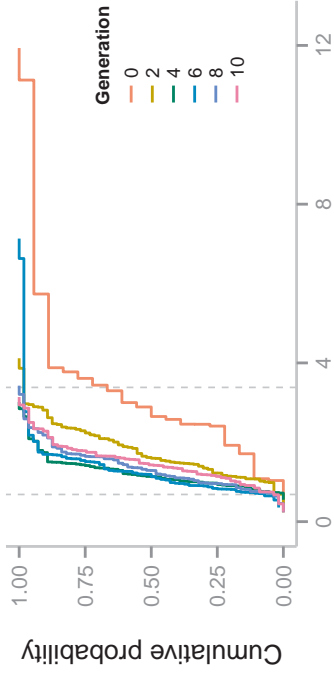

### Families in upper quantile

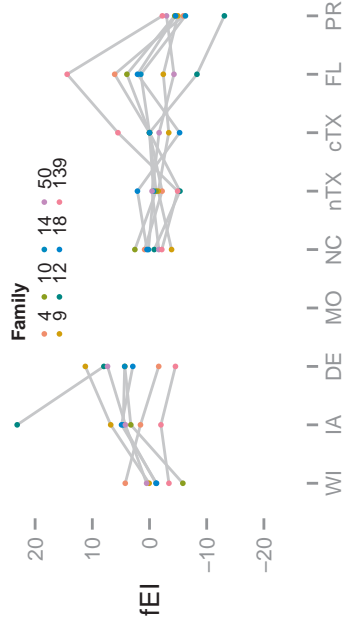

### Families in lower quantile

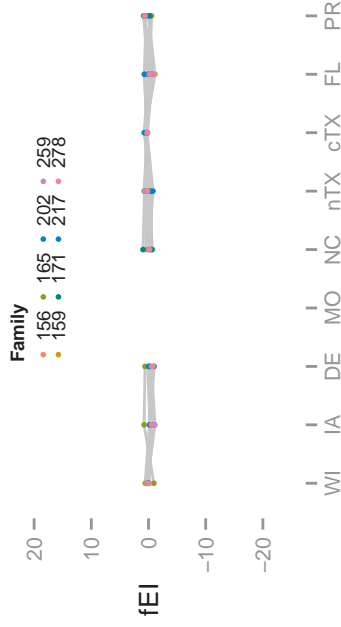

## DTA

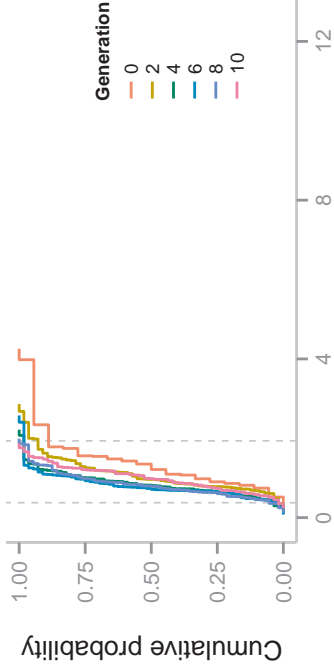

### Families in upper quantile

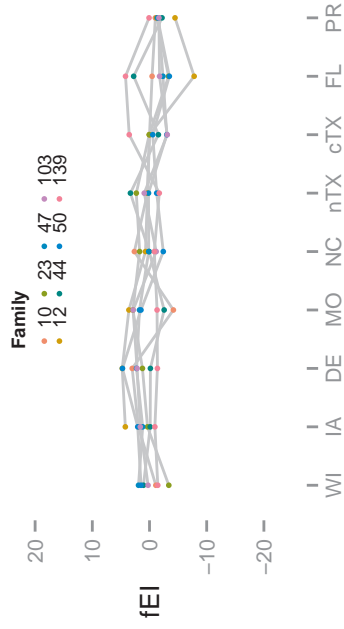

### Families in lower quantile

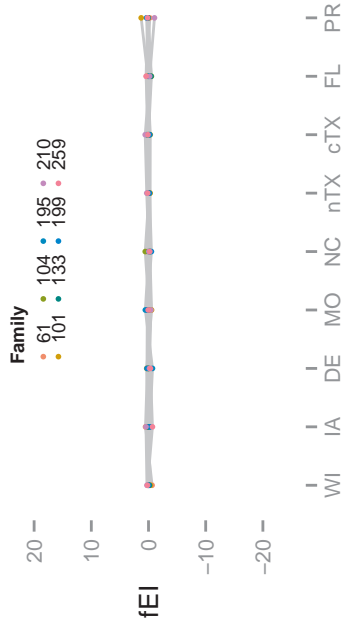

Supplement: hdy201490x1.pdf [file hdy201490x1.pdf]
